# Supplementary material
Source: publisher figshare collection journal article supplement (https://rs.figshare.com/ndownloader/files/18605483)

Supplementary material

TABLES

**Table S1** Primers sequences and qPCR performances

| **Gene** | **Primers** | **Amplicon**  **size bp** | **Amplification efficiency (%)** | **Accession number** | **Reference** |
| --- | --- | --- | --- | --- | --- |
| *EF1* | 5’- CGTTTTGCTGTCCGAGACATG -3  5’- CCACGCCTCACATCATTTCTTG -3’ | 135 | 99 | AB162021 | Ciocan et al., 2011 |
| *Hel* | 5’- GCACTCATCAGAAGAAGGTGGC -3’ 5’- GCTCTCACTTGTGAAGGGTGAC -3’ | 129 | 132 | DQ158075 | Cubero-Leon et al., 2012 |
| *CS* | 5’- AACAGAAGCCAGGCACTATATC -3’ 5’- GTCAGAACCAGCACAGTAGTC -3’ | 106 | 104 | EF535882 | Balbi et al., 2017 |
| *CA* | 5’- ACCAGATGGTCTTGCAGTTT -3’ 5’- TCATCTCTGACTGCTGCTAATG -3’ | 102 | 95 | LK934681 | Balbi et al., 2016 |
| *EP* | 5’- TAAACTCTGGACACGCATACC -3’ 5’- GAGTCCCTCTTGGTGCATATT -3’ | 100 | 100 | AY364453 | Balbi et al., 2016 |
| *TYR* | 5’-CGATTCTTTATACATGAAATCTGTG -3’ 5’-AAACCGTTATAACAACGTGCTAA -3’ | 113 | 111 | KV583276.1 | This study |

EF1 = *M. galloprovincialis elongation factor-1α*; HEL = *M. galloprovincialis helicase*; CS = *M. galloprovincialis chitin synthase*; CA = *M. edulis carbonic anhydrase*; EP = *M. edulis extrapallial protein*; TYR = *M. galloprovincialis tyrosinase*.

**References**

Ciocan CM, Cubero-Leon E, Minier C, Rotchell JM. 2011 Identification of reproduction-specific genes associated with maturation and estrogen exposure in a marine bivalve *Mytilus edulis*. Plos ONE **6**, e22326. (doi:10.1371/journal.pone.0022326)

Cubero-Leon E, Ciocan CM, Minier C, Rotchell JM. 2012 Reference gene selection for qPCR in mussel, *Mytilus edulis*, during gametogenesis and exogenous estrogen exposure. Environmental Science and Pollution Research **19**, 2728–2733. (doi:10.1007/s11356-012-0772-9)

Balbi T, Camisassi G, Montagna M, Fabbri R, Franzellitti S, Carbone C, Dawson K, Canesi L. 2017 Impact of cationic polystyrene nanoparticles (PS-NH2) on early embryo development of *Mytilus galloprovincialis*: Effects on shell formation. Chemosphere **186**, 1–9. (doi:10.1016/j.chemosphere.2017.07.120)

Balbi T, Franzellitti S, Fabbri R, Montagna M, Fabbri E, Canesi L. 2016 Impact of bisphenol A (BPA) on early embryo development in the marine mussel *Mytilus galloprovincialis* : Effects on gene transcription. Environmental Pollution **218**, 996–1004. (doi:10.1016/j.envpol.2016.08.050)

**Table S2** - TYR and CS primer pairs utilized to amplify one fragment of cDNA for each gene.

| **Gene** | **Primers** | **Accession number** | **Reference** |
| --- | --- | --- | --- |
| *TYR* | 5’-ATGCGATTCTTTATACATGAAA-3’  5’-TTGGTGGTTTTGGTACATGT-3’ | KV583276.1 | This study |
| *CS* | 5’-ATGAAAACAGAAGATTTAAGTGA-3’  5’-CCATTAATGATAGGATTCCATC-3’ | [EF535882.1](https://www.ncbi.nlm.nih.gov/nucleotide/EF535882.1?report=genbank&log$=nuclalign&blast_rank=1&RID=JT3GZVKE015) | This study |

**Table S3** – Basal mRNA levels of unfertilized eggs evaluated by qPCR. Data, representing the mean±SD of at least 5 independent mRNA samples, are reported as δCt = Ct target gene – Ct EF1/HEL (normalized with respect to the EF1/HEL reference genes).

|  | δCt |
| --- | --- |
| CA | 33.57±1.25 |
| EP | 33.60±1.20 |
| TYR | 32.52±1.37 |
| CS | 24.99±1.13 |

**Methods**

**Larval rearing**

All procedures were carried out as previously described (Balbi et al., 2016, 2017). After spawning, mussels were removed from beakers and sperms and eggs were sieved through 50 μm and 100 μm meshes, respectively, to remove impurities. Egg quality (shape, size) and sperm motility were checked using an inverted microscope. Eggs were fertilized with an egg:sperm ratio 1:10. After 30 min fertilization success (n. fertilized eggs / n. total eggs × 100) was verified by microscopical observation (>85%) (appearance of the polar globe). After fertilization, samples were maintained at 16 ± 1°C, pH 8.15, with a 16h:8 h light:dark photoperiod.

**References**

Balbi T, Camisassi G, Montagna M, Fabbri R, Franzellitti S, Carbone C, Dawson K, Canesi L. 2017 Impact of cationic polystyrene nanoparticles (PS-NH2) on early embryo development of *Mytilus galloprovincialis*: Effects on shell formation. Chemosphere **186**, 1–9. (doi:10.1016/j.chemosphere.2017.07.120)

Balbi T, Franzellitti S, Fabbri R, Montagna M, Fabbri E, Canesi L. 2016 Impact of bisphenol A (BPA) on early embryo development in the marine mussel *Mytilus galloprovincialis* : Effects on gene transcription. Environmental Pollution **218**, 996–1004. (doi:10.1016/j.envpol.2016.08.050)

**In situ hybridization**

Larvae were sampled at different times pf with a 60 µm mesh filter, fixed in 4% PFA in MFSW overnight at 4°C, washed in 1X Phosphate Buffer Saline-PBS (137 mM NaCl, 2.7 mM KCl, 10 mM Na2HPO4, 1.8 mM KH2PO4, pH 7.4), kept in 100% methanol at -20°C. Larvae were then re-hydrated in MFSW, washed 2 x 5 min in 0.1% Tween-20 in PBS-PBST, incubated in 10 µg/mL Proteinase K in PBS for 25 min, washed 2 x 5 min in PBST, clarified with 0.1 M glycine in PBS for 5 min, washed with PBST 2 x 5 min, fixed with 4% PFA in PBS for 40 min, washed in PBST 3 x 5 min. Samples were then placed in Hybridization buffer (50% formamide, 5X Denhart’s, 1 mg/mL yeast Torula total RNA, 0.1% Tween-20) at RT for 10 min, then at 65°C for 2 h and hybridized for 16 h in the same solution. Larvae were then washed in 5 solutions: 2 x 30’ in solution 1 (50% formamide, 5X Saline sodium citrate-SCC (20X stock solution, pH 7.0), 0,1% Sodium Dodecyl Sulfate-SDS) at 65°C, 1 x 30’ in solution 2 (50% formamide, 2X SSC, 0,1% SDS) at 65°C, 1 x 20’ in solution 3 (2X SSC, 0.1% tween 20) at 65°C, 2 x 30’ in solution 4 (0.2X SSC, 0.1% Tween 20) at 65°C, PBST 5 minutes at RT, 1 x 60’ at RT in blocking solution (0.1 M Tris, pH 7.5; 0.15 M NaCl; 0.5% Boheringer Blocking Agent -BBR, Roche, Milan). Detection was performed after overnight incubation at 4°C with an alkaline phosphatase coupled anti-DIG antibody (Sigma Aldrich, Lyon, France) diluted 1:4000 in blocking solution. After 10 x 5’ washes with 0.1% Tween-20 in 1X Tris-Buffered Saline-TBST (50 mM Tris-HCl, pH 7.6; 150 mM NaCl), larvae were washed once with the Nitro Blue Tetrazolium/5-Bromo-4-Chloro-3-Indolyl-Phosphate/ (NBT/BCIP) buffer (0.1 M Tris-HCl pH 9.5, 50 mM MgCl2, 100 mM NaCl, 0.1% Tween, 2% NBT and BCIP) and the precipitation was induced with addition of NBT/BCIP in the same buffer. Blue colour development was stopped with 1 x 5’ wash in TBST with EDTA 50 mM and 3 x 5’ washes in TBST. Samples were stored in 80% glycerol at +4°C. Images were taken with a ZEISS Axio Imager 2 microscope.

**Figures**

**Figure S1 -** *Mg-tyr* sequence analysis

A)*Mg-tyr* partial cDNA and deduced amino acid sequence. The promoter sequence (ATG) and translation termination codon (TAA) are indicated in green and violet, respectively. The two copper binding domains (CuA and CuB) are highlighted in grey and yellow, respectively, and the corresponding histidine residues whithin in red. The chitin binding domain type 2 is indicated in blue.

B) Multiple alignment of the two copper-binding domains (CuA and CuB) between *Mg-tyr* and tyrosinase genes of other bivalves *M. coroscus* (*Mc-Tyr1*) and *C. gigas* (*Cgi-Tyr1*). The conserved histidine residues are indicated in red.

**A)**

**1 M M T V E E R E K Y F N A I T T L K S T**

**1 ATGATGACTGTCGAAGAACGAGAAAAATACTTTAATGCAATTACAACATTGAAATCCACA**

**21 N E Q V D N E S I S R F G L L A A F H S**

**61 AATGAACAAGTCGACAACGAATCAATCAGTCGTTTCGGTTTGTTGGCAGCTTTTCATTCT**

**41 G E Q L G A H G G C G F G P W H R A F L**

**121 GGTGAACAGTTGGGGGCTCATGGTGGATGTGGATTTGGCCCGTGGCACAGAGCTTTCTTG**

**61 I M Y E Q A M M Q V D P T V T L P Y W D**

**181 ATAATGTATGAACAGGCTATGATGCAAGTTGATCCTACCGTTACGCTTCCTTATTGGGAT**

**81 S T L D F Y M E D A T Q S I L W T D K F**

**241 TCAACTCTCGACTTCTATATGGAAGACGCTACACAGTCTATCTTATGGACTGACAAATTT**

**101 M G N G D G L V T T G P F K N W E T A V**

**301 ATGGGAAATGGAGATGGATTAGTTACAACAGGTCCATTCAAAAACTGGGAAACTGCTGTT**

**121 G P L T R N I G V S G K L Y S E E D F L**

**361 GGACCTTTAACAAGAAATATTGGAGTTTCTGGAAAACTTTACAGCGAAGAAGACTTTTTA**

**141 N V T S R T R Y G E I C G D E A L P E H**

**421 AATGTCACGTCAAGGACAAGATATGGAGAAATTTGTGGAGATGAAGCATTACCCGAGCAT**

**161 D M E F L H G P P H V W I D G Q M G I I**

**481 GACATGGAGTTTTTACACGGACCTCCTCATGTTTGGATTGATGGTCAGATGGGAATTATT**

**181 E T A A H D P I F F M H H S F V D L I W**

**541 GAGACAGCTGCCCATGATCCTATCTTTTTTATGCATCATTCCTTTGTGGATCTTATATGG**

**201 E K F R D N Q R R N G I D P Q V D Y P A**

**601 GAAAAGTTTAGAGACAACCAAAGACGGAATGGAATAGACCCTCAGGTAGATTATCCTGCC**

**221 E F F G D I F H A P E E A M G I G S M T**

**661 GAATTCTTTGGAGATATATTTCATGCACCAGAGGAGGCAATGGGGATCGGAAGTATGACA**

**241 M K D G L D D K F T R D I Y E Y A P R P**

**721 ATGAAAGATGGTTTGGACGACAAATTTACTAGAGACATATATGAGTATGCTCCTCGACCA**

**261 T C S R N N Q D C G S K Y I K C V D V A**

**781 ACTTGTAGTAGAAATAATCAGGATTGTGGCTCTAAATATATAAAGTGTGTTGATGTAGCT**

**281 G A F R C V S K T L E E Y E D D M A T G**

**841 GGTGCATTTAGGTGTGTGTCAAAAACACTGGAAGAATATGAAGATGACATGGCAACTGGA**

**301 G G N T G G G N T G G G N T G G G N T G**

**901 GGAGGAAATACTGGTGGAGGAAATACTGGTGGTGGAAACACAGGAGGTGGAAACACTGGT**

**321 G G N T G G G N T G G G N T G G G S C P**

**961 GGTGGAAATACCGGAGGGGGAAACACCGGAGGAGGAAACACAGGAGGCGGCAGCTGTCCA**

**341 T P K P H V P K P P K V K P T L H K P V**

**1021 ACTCCAAAGCCACATGTACCAAAACCACCAAAAGTAAAGCCTACATTACACAAACCTGTA**

**361 Q N N F C V N G K S D T R E W V Y L P I**

**1081 CAAAACAACTTTTGTGTAAATGGAAAAAGTGACACAAGAGAATGGGTTTATTTACCAATT**

**381 R V T Y Q R P P D F T N Y G S Y P I R N**

**1141 AGAGTAACATATCAACGGCCACCAGATTTCACCAATTATGGATCTTACCCAATTCGCAAT**

**401 G K Q A S K S D I Y A P S G Y S A M N K**

**1201 GGAAAGCAGGCATCAAAATCAGATATCTATGCTCCATCTGGATATTCAGCTATGAACAAA**

**421 Y I R P G R P E N Y G N C K S S T S G A**

**1261 TACATAAGACCAGGTAGACCAGAAAACTATGGAAATTGTAAAAGTTCCACTAGCGGTGCA**

**441 G E M Y I Q S D G L N Y D G T Y R E Y A**

**1321 GGTGAAATGTACATACAATCTGATGGACTTAATTATGATGGGACATATAGGGAATATGCA**

**461 V I D H R L A I S M S V A Y V A V K K P**

**1381 GTTATTGATCATCGTTTAGCTATATCCATGTCAGTTGCATATGTTGCGGTGAAGAAACCA**

**481 E I H D P S D V V I S A F D S C G R V C**

**1441 GAGATCCATGATCCATCTGATGTCGTAATTTCTGCCTTTGATTCATGTGGGAGAGTATGT**

**501 H A T C L I P G T D Y Y R P C S G A L R**

**1501 CACGCTACGTGTTTAATCCCGGGTACTGATTACTACAGACCGTGTTCTGGTGCATTAAGA**

**521 I S D V P R F P K M Y G G N F G N S V M**

**1561 ATTTCCGATGTTCCACGTTTCCCAAAAATGTATGGTGGAAATTTTGGAAATTCTGTTATG**

**541 N V W N Y T S S A S C P Q F N I D Q I Y**

**1621 AACGTTTGGAATTACACATCTTCTGCATCATGTCCACAATTCAACATTGATCAAATATAC**

**561 V S F F C D Y S N R W P W E H A R K Q N**

**1681 GTCTCTTTCTTCTGTGATTACAGTAACAGGTGGCCTTGGGAACATGCACGTAAACAGAAC**

**581 L P P P P P K R R P S V D N Q P K G P R**

**1741 CTCCCTCCACCACCACCAAAACGTAGACCCTCAGTAGACAATCAACCAAAAGGACCACGT**

**601 V A N K Q T D A S L S L P Q T P Q K Q S**

**1801 GTAGCAAATAAACAAACTGATGCTAGCTTGTCATTGCCCCAAACACCTCAAAAACAAAGT**

**621 K Y Y I D K ***

**1861 AAGTATTATATTGACAAGTAA**

**B)**

**M.galloprovincialis Tyr-CuA HSGEQLG-AHGGCGFGPWHRAFLIM 62**

**M.coruscus (AKS48166.1) HQGAVGESAHDGPNFVSWHRYFLVL 157**

**C.gigas (AGZ15753.1) HSGQAARMMHNGPAFLPRHMVYLLV 178**

***.* *.* * * :*::**

**M.galloprovincialis Tyr-CuB HGPPHVWIDGQ---MGIIETAAHDPIFFMHHSFVDLIWEKFRD 207**

**M.coruscus (AKS48166.1) HDNVHRWVGGNTGQMSSILFSPMDPVFWLLHCFVDYLWEKFRE 308**

**C.gigas (AGZ15753.1) HNGVHNYIDGY---MSGLNTASWDPVFWFIHSFSQLLWVAFRN 321**

***. * ::.* *. : : **:*:: *.* : :* **:**

**Figure S2**

ISH: TYR and CS antisense (A) and sense (B) probe signals at 24 and 48 hpf. Scale bars: 10 µm.


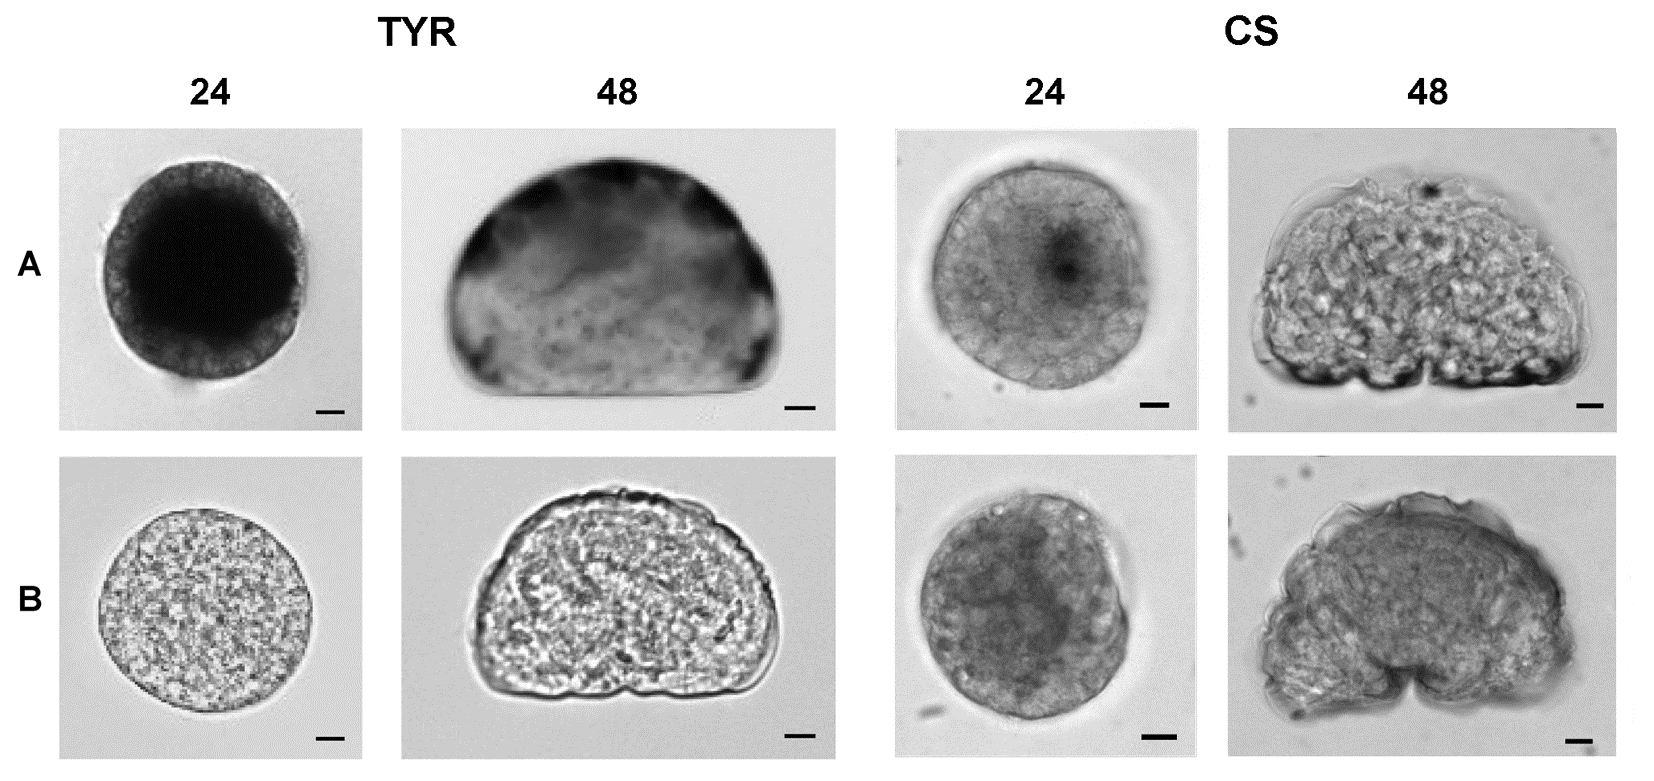


**Figure S3**

Details of shell field evagination and hinge straightening from 24 to 29 hpf. A) brightfield image; B) merged calcofluor (blue), calcein (green) fluorescent signals and brightfield images as in Fig. 1. Scale bars: 10 µm. The invagination area, corresponding to the hinge region, is indicated by white arrows (A). At 24 hpf the invagination is well visible in the brightfield but partially covered by the organic matrix (blue). The indentation becomes less evident at 26 hpf and by 29 hpf the hinge area is straightened.


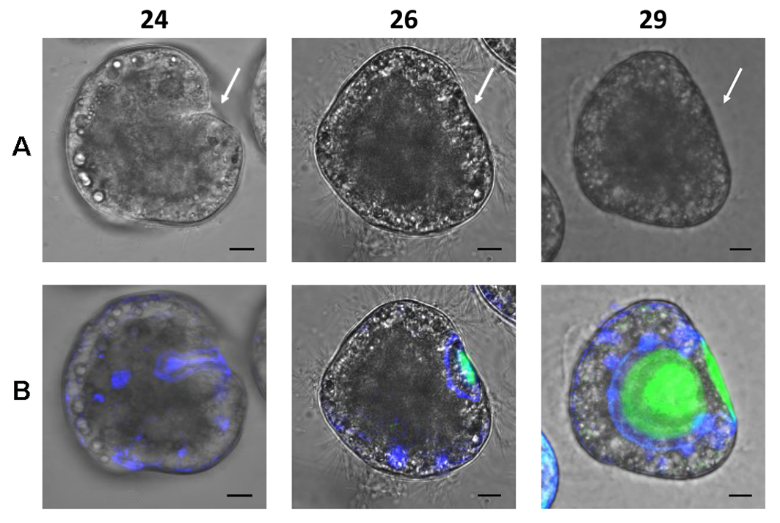


**Figure S4**

Effect of PTU (10 µM) on *M. galloprovincialis* shell formation at 48 hpf. Representative images of control (A) and exposed embryos (B-D) showing the total body in brightfield, organic matrix (blue) and calcified shell (green) as in Fig. 5. With respect to controls, a variety of malformations are noticeable: patched and dis-homogeneous growth of both organic matrix and calcified shell (B), asymmetric growth of the matrix and single valve calcification (C), absent or barely detectable calcification (D). Scale bar: 10 µm. N.B.: Since in PTU-exposed samples lower calcein and calcofluor signals were observed with respect to controls, images were recorded at higher laser voltage (see Fig. 5).


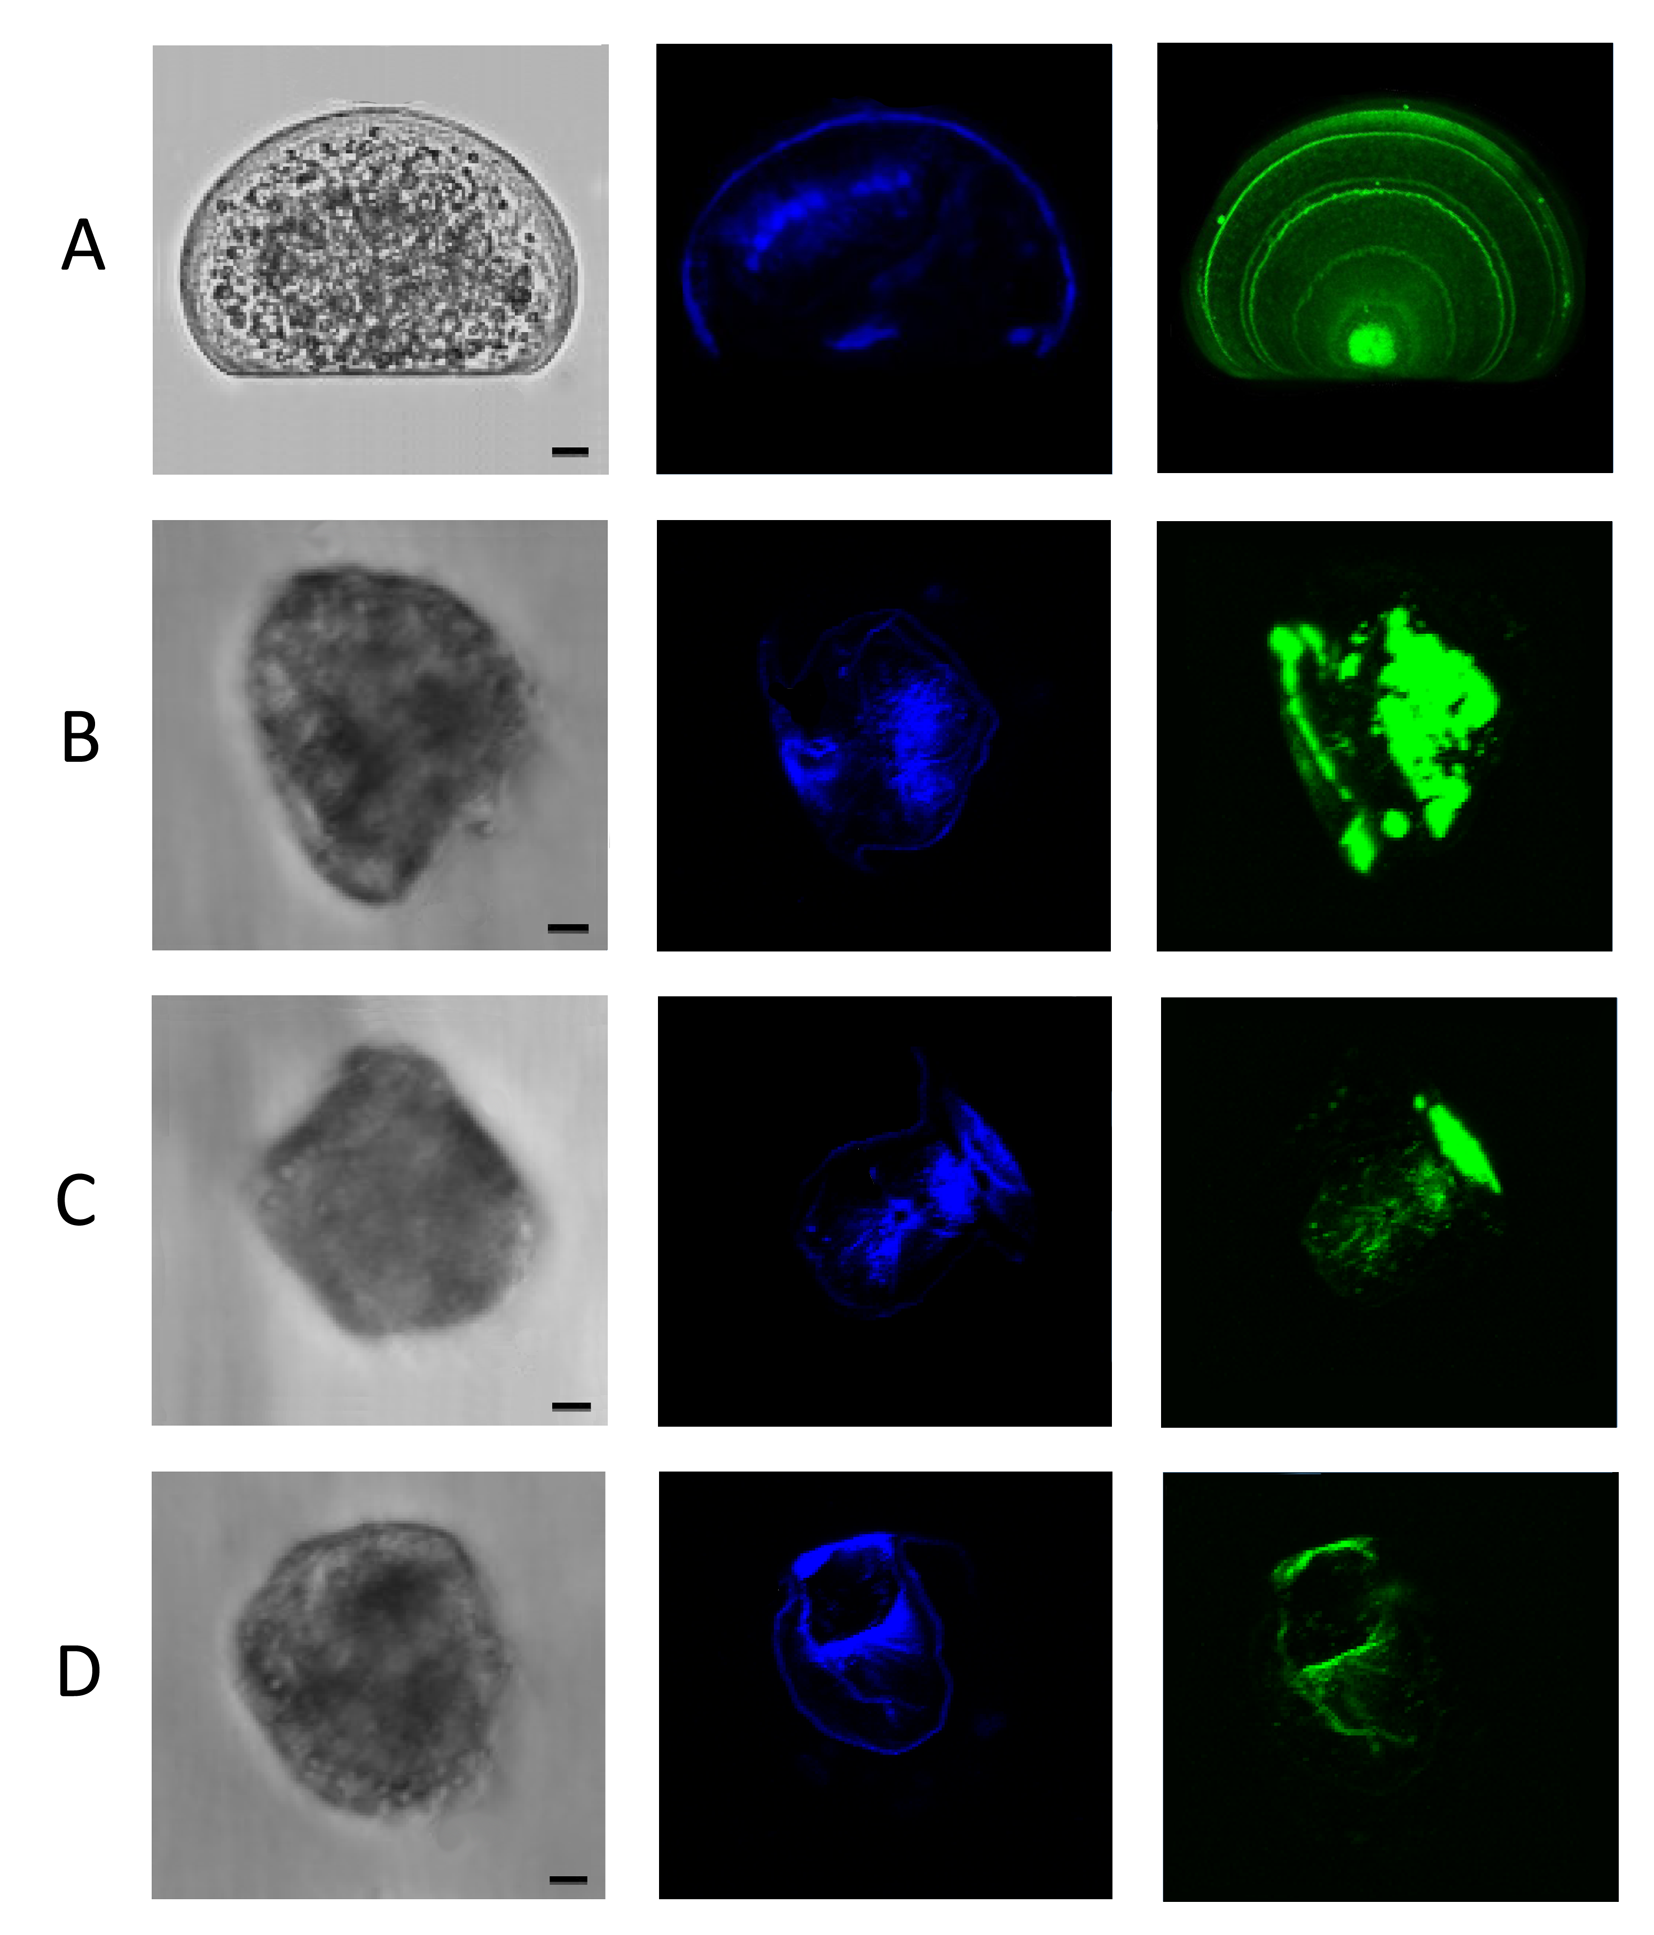

Supplement: Supplementary file 1 [file 18605483]
